# Supplementary material for: A complementary absorption small molecule for efficient ternary organic solar cells
Source: Royal Society of Chemistry journal article supplement (doi:10.1039/c6ta00783j), 2016-01-01
Supplement: c6ta00783j1.pdf [file c6ta00783j1.pdf]

## A Complementary Absorption Small Molecule for Efficient Ternary Organic Solar Cells

Liangang Xiao,<sup>1</sup> Ke Gao,<sup>1</sup> Yangdong Zhang,<sup>2</sup> Xuebin Chen,<sup>1</sup> Lintao Hou,<sup>2</sup> Yong

Cao,<sup>1</sup> Xiaobin Peng<sup>1\*</sup>

1. State Key Laboratory of Luminescent Materials and Devices, Institute of Polymer Optoelectronic Materials and Devices, South China University of Technology, 381 Wushan Road, Guangzhou 510640, China

2. Siyun Laboratory, Department of Physics, Jinan University, Guangzhou 510632, China

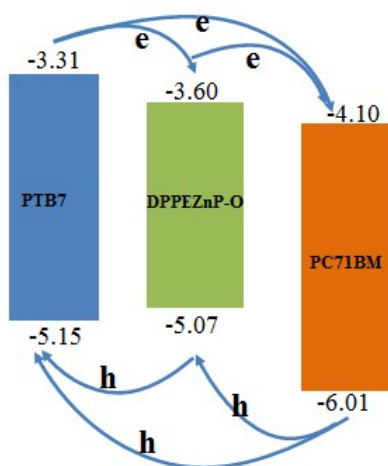

Figure S1. Energy levels of PTB7, DPPEZnP-O and PC<sub>71</sub>BM.

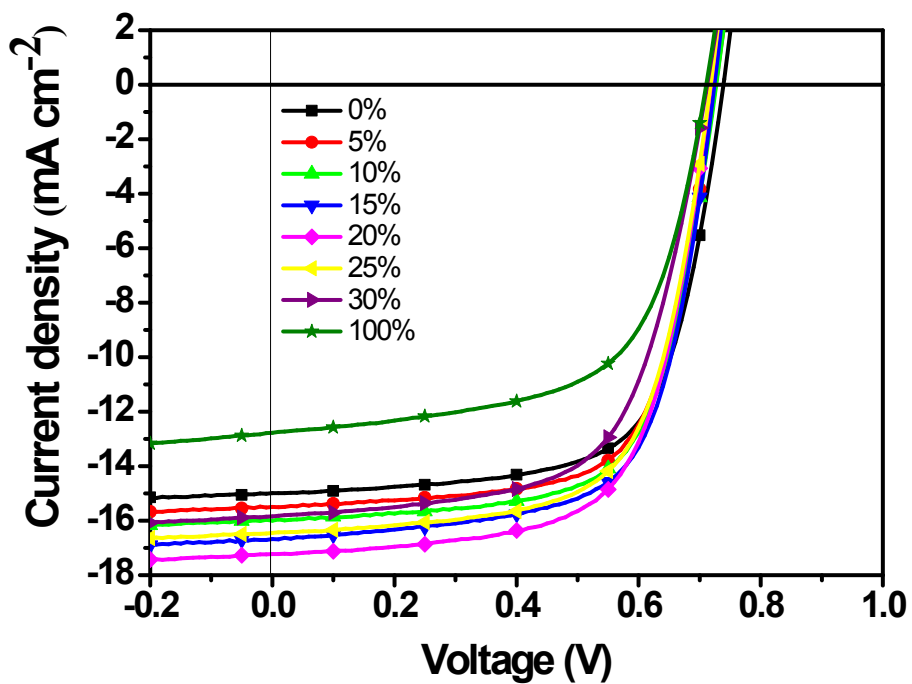

Figure S2. J-V characteristics of the solar cells based on the PTB7:DPPEZnP-O:PC<sub>71</sub>BM blend.

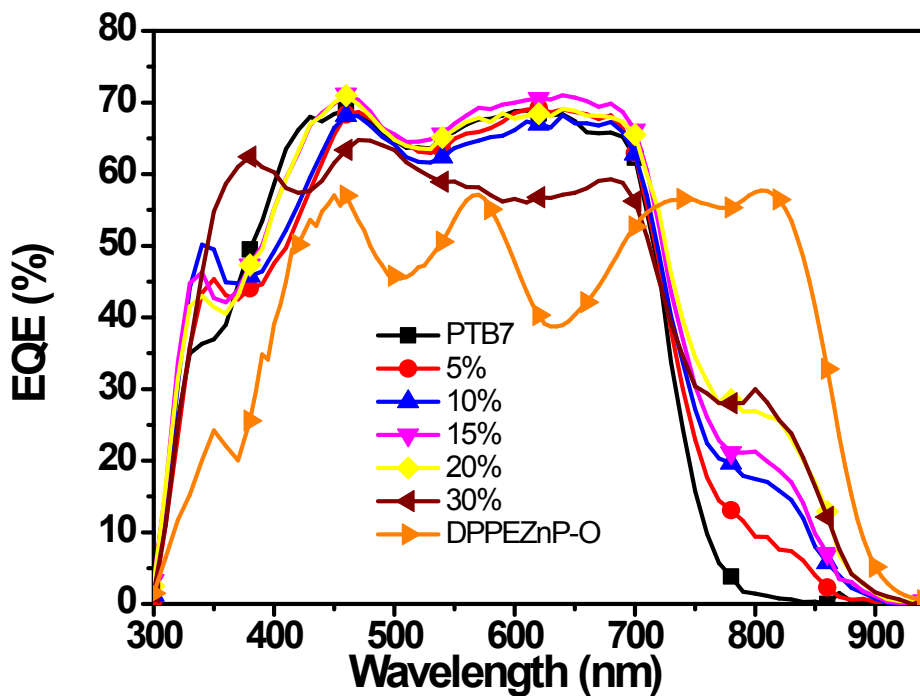

Figure S3. EQE spectra of ternary solar cells with different DPPEZnP-O incorporation.

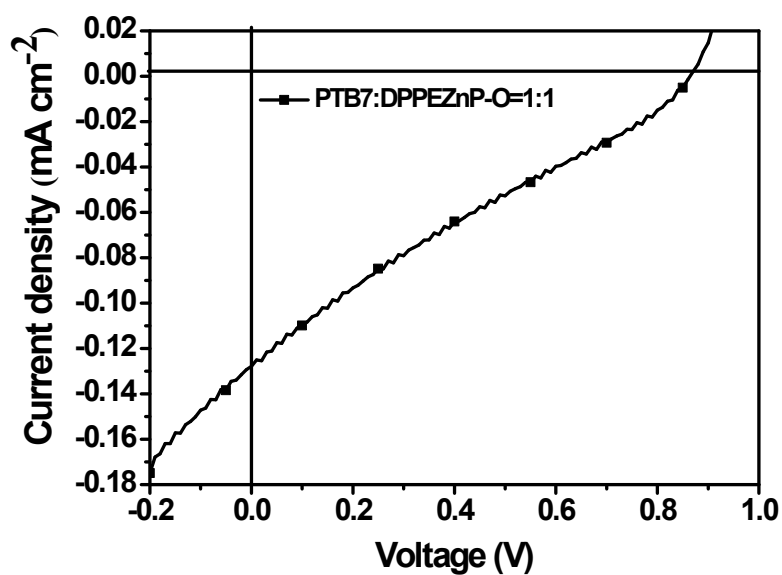

Figure S4. J-V curves of solar cells based on PTB7:DPPEZnP-O in a ratio of 1:1.

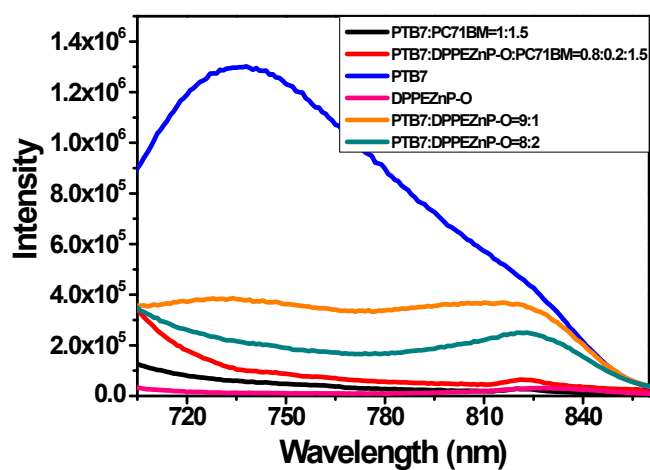

Figure S5. PL spectra of pristine PTB7 and DPPEZnP-O films, PTB7:DPPEZnP-O films with different DPPEZnP-O incorporation ratio and PTB7:DPPEZnP-O:PC<sub>71</sub>BM film under 680 nm light excitation.

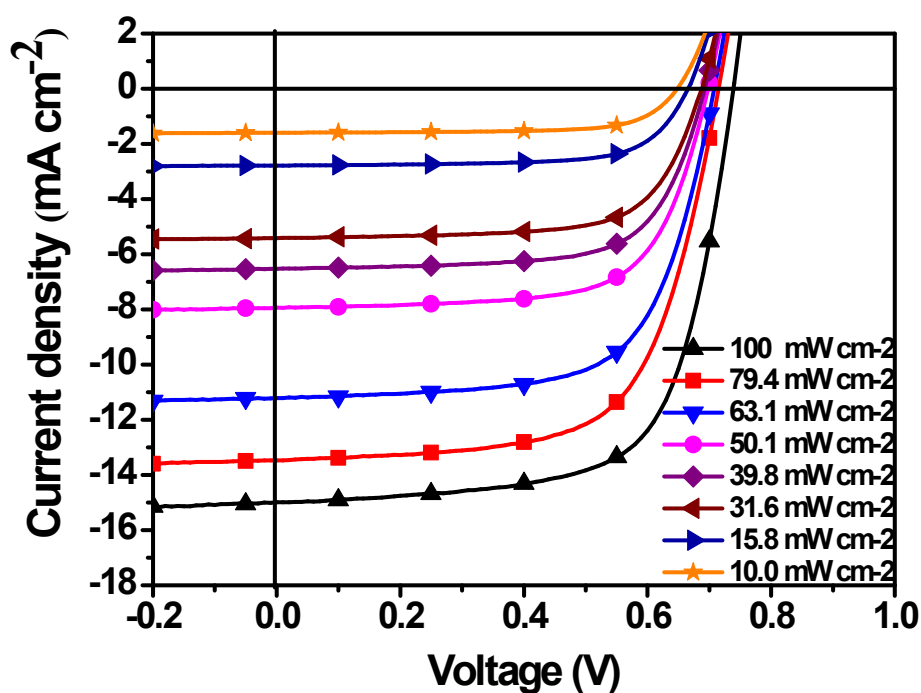

Figure S6. J-V curves of binary solar cells based on PTB7:PC<sub>71</sub>BM under different light intensities from 10 mW cm<sup>-2</sup> to 100 mW cm<sup>-2</sup>.

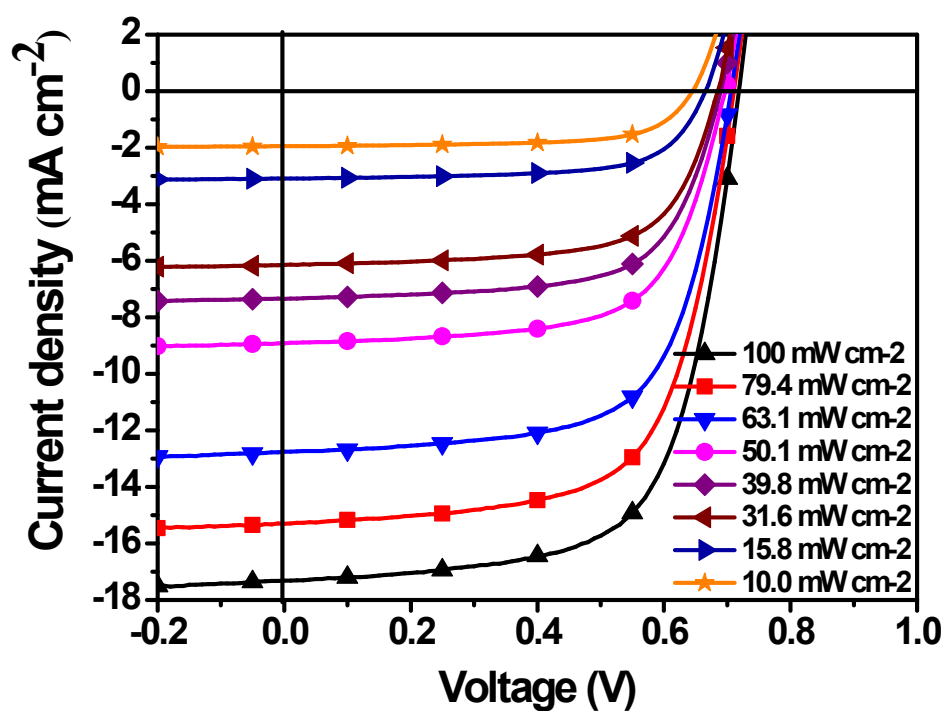

Figure S7. J-V curves of the optimized ternary solar cells with 20% DPPEZnP-O composition under different light intensities from 10 mW cm<sup>-2</sup> to 100 mW cm<sup>-2</sup>.

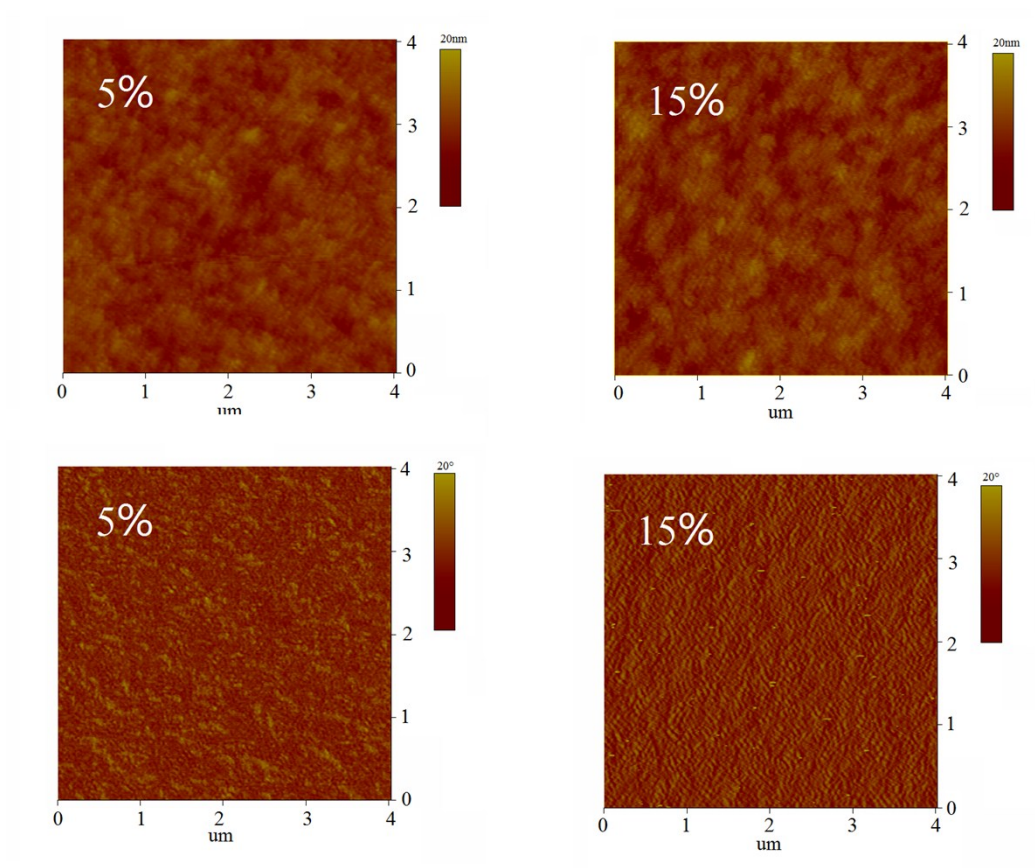

Figure S8. AFM height images (top) and phase images (bottom) of PTB7:DPPEZnP-O:PC<sub>71</sub>BM films spin-coated on ITO/PEDOT:PSS substrates with different DPPEZnP-O incorporation.
